# Supplementary material for: Hepatocyte specific expression of an oncogenic variant of β-catenin results in cholestatic liver disease
Source: PubMed Central journal article supplement (PMC5349966; doi:10.18632/oncotarget.13521), 2016-11-23
Supplement: oncotarget-07-86985-s001.pdf [file oncotarget-07-86985-s001.pdf]

## Hepatocyte specific expression of an oncogenic variant of $\beta$ -catenin results in cholestatic liver disease

### Supplementary Materials

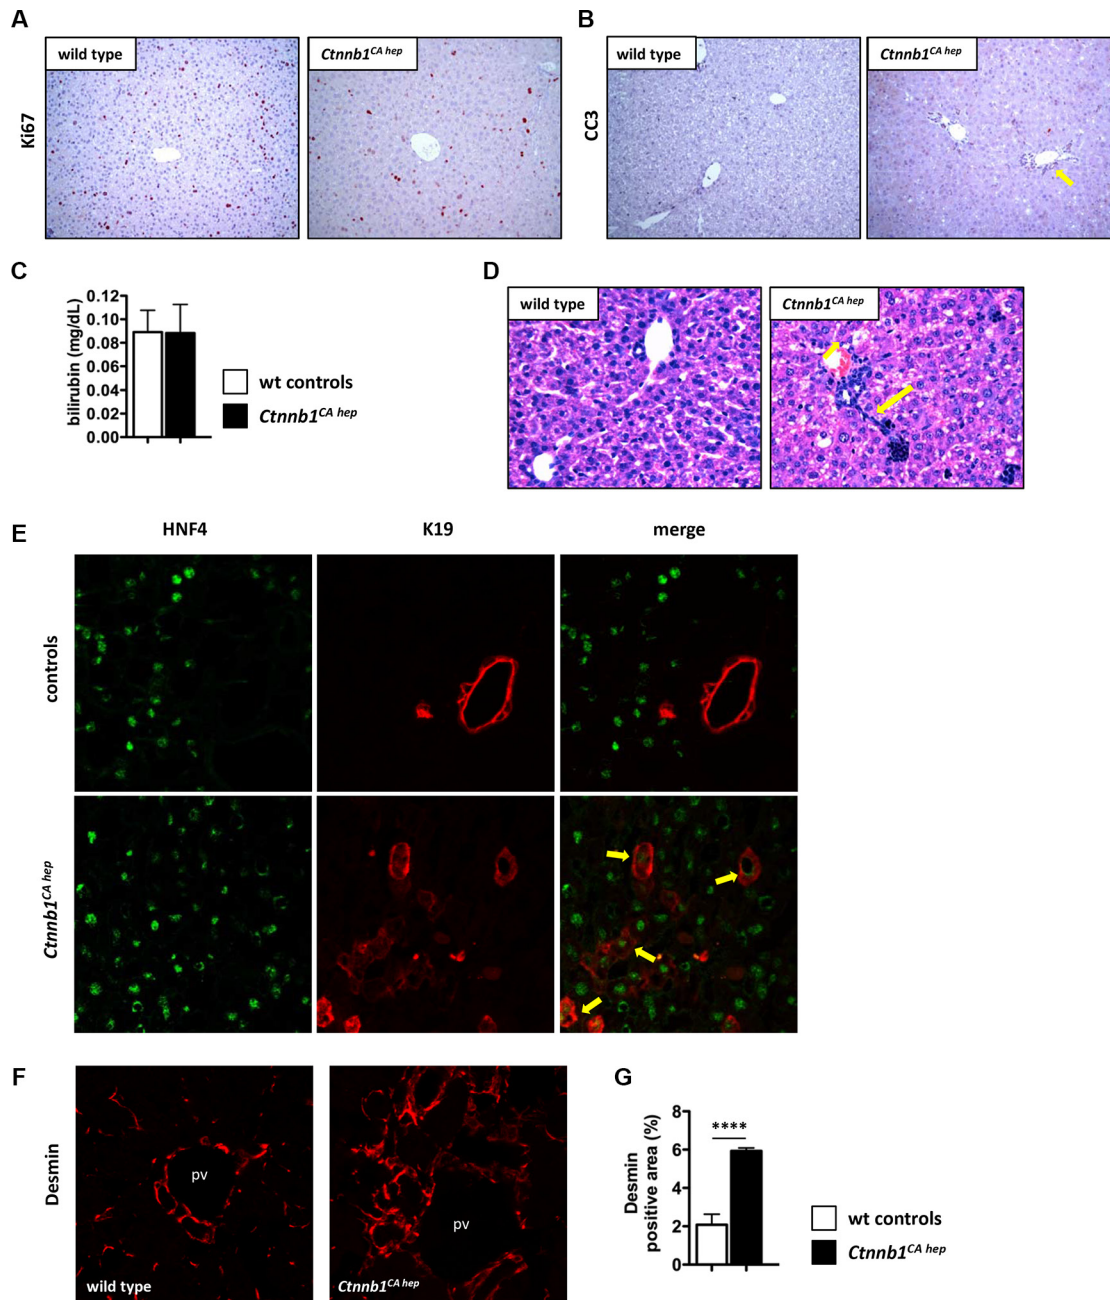

**Supplementary Figure S1: Histological analysis of livers of *Ctnnb1<sup>CA hep</sup>* mice.** Livers of *Ctnnb1<sup>CA hep</sup>* mice show no changes in proliferation compared to wt controls as analyzed by immunohistochemical staining for the proliferation marker Ki67 (A). Cholangiocytes of bile ducts reveal apoptosis in *Ctnnb1<sup>CA hep</sup>* mice as detected by immunohistochemical staining for cleaved caspase 3 (CC3) (B). No changes in bilirubin could be detected (C). Increased cholangiocyte numbers are detected in H&E stained sections of *Ctnnb1<sup>CA hep</sup>* mice compared to wt controls (yellow arrows) (D). *Ctnnb1<sup>CA hep</sup>* mice displayed a dedifferentiation of hepatocytes, confirmed by double immunofluorescence staining for HNF4 and Keratin 19 (K19). Double-positive cells are marked by arrows (E). *Ctnnb1<sup>CA hep</sup>* mice show significantly enhanced numbers of collagen producing hepatic stellate cells as analyzed by immunofluorescence staining for Desmin (F). Desmin positive areas were significantly increased as evaluated by morphometric quantification using Image J (pv = portal vein) (G).

**A**

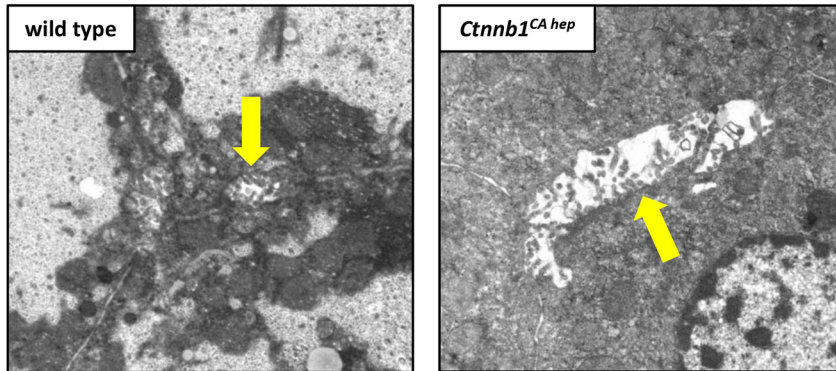

**B**

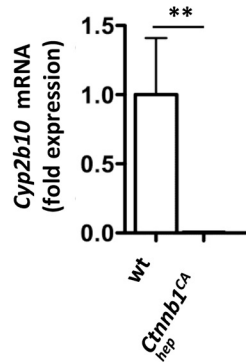

Supplementary Figure S2: Evaluation of electron microscopy images revealed dilated bile canaliculi in *Ctnnb1*<sup>CA hep</sup> mice (yellow arrow) (A). mRNA levels of the CAR target gene *Cyp2b10* was completely abolished in livers of *Ctnnb1*<sup>CA hep</sup> mice (B).

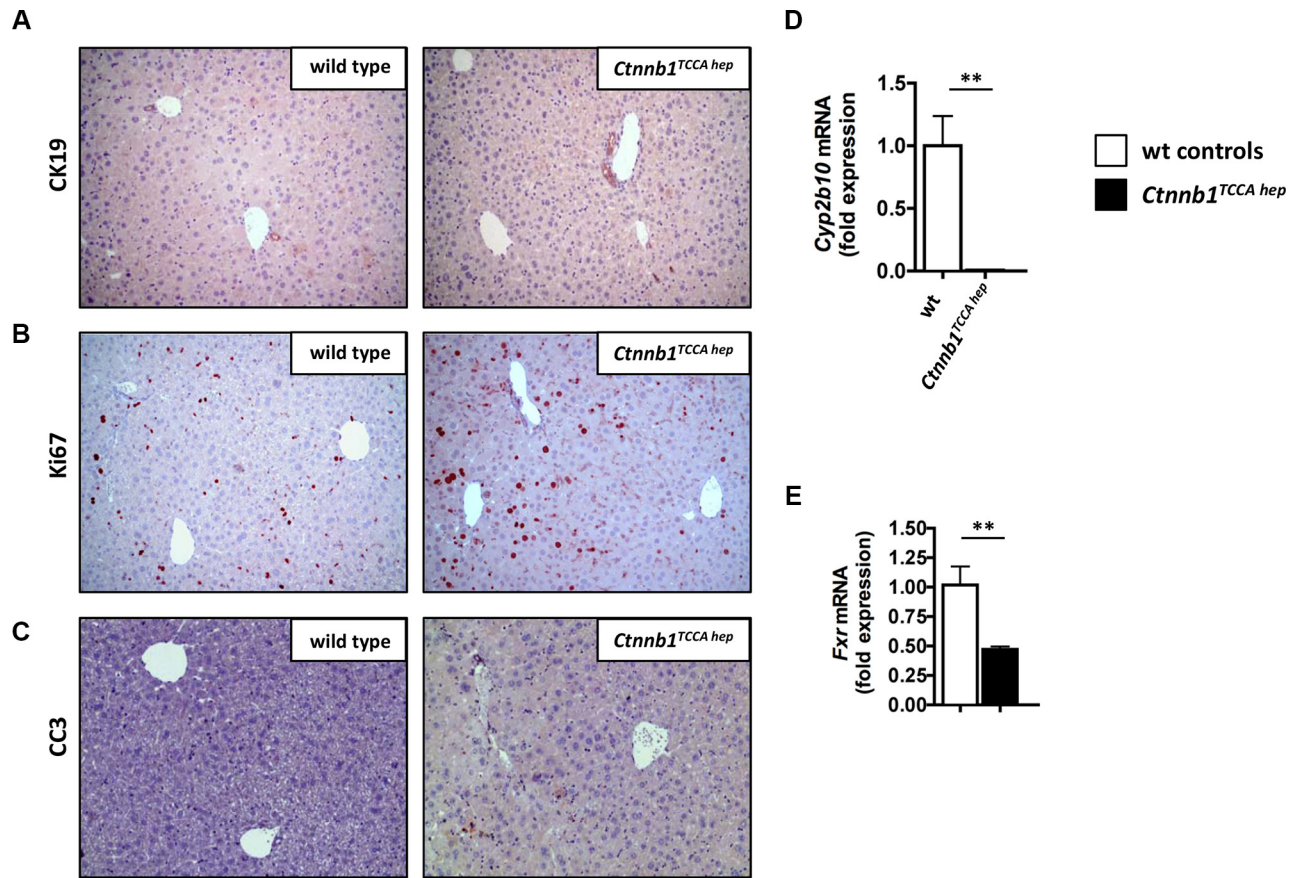

**Supplementary Figure S3: *Ctnnb1*<sup>TCCA hep</sup> mice display increased numbers of Keratin 19 positive cholangiocytes compared to wt controls.** (A) Immunohistochemical staining for Ki67 and cleaved caspase 3 (CC3) revealed no significant changes in regards to proliferation (B) or apoptosis (C) in livers of *Ctnnb1*<sup>TCCA hep</sup> mice. mRNA levels of the CAR target gene *Cyp2b10* was completely abolished in livers of *Ctnnb1*<sup>TCCA hep</sup> mice (D). *Ctnnb1*<sup>TCCA hep</sup> mice displayed a significant decrease of *Fxr* levels in enterocytes of the terminal ileum compared to wt controls (E).
